# Supplementary material for: The Synthetic Peptide GA-Hecate and Its Analogs Inhibit Multiple Steps of the Chikungunya Virus Infection Cycle In Vitro
Source: MDPI journal article supplement (doi:10.3390/ph16101389), 2023-09-30
Supplement: s1 [file s1]

# **The Synthetic Peptide GA-Hecate and Its Analogs Inhibit Multiple Steps of the Chikungunya Virus Infection Cycle In Vitro**

Gabriela Miranda Ayusso <sup>1,†</sup>, Paulo Ricardo da Silva Sanches <sup>2,\*,†</sup>, Tamara Carvalho <sup>1</sup>, Igor Andrade Santos <sup>3</sup>, Daniel Oliveira Silva Martins <sup>1,3</sup>, Maria Letícia Duarte Lima <sup>1</sup>, Pâmela Jójce Previdelli da Conceição <sup>1</sup>, Cíntia Bittar <sup>1,4</sup>, Andres Merits <sup>5</sup>, Eduardo Maffud Cilli <sup>6</sup>, Ana Carolina Gomes Jardim <sup>1,3</sup>, Paula Rahal <sup>1</sup> and Marília Freitas Calmon <sup>1,\*</sup>

<sup>1</sup> Institute of Biosciences, Letters and Exact Sciences, São Paulo State University, São José do Rio Preto 15054-000, SP, Brazil; gabriela.ayusso@unesp.br (G.M.A.); tamara.carvalho@unesp.br (T.C.); daniel.os.martins@unesp.br (D.O.S.M.); maria-leticia.lima@unesp.br (M.L.D.L.); pamela.joyce@unesp.br (P.J.P.d.C.); cintia.bittar@unesp.br (C.B.); jardim@ufu.br (A.C.G.J.); p.rahal@unesp.br (P.R.)

<sup>2</sup> School of Pharmaceutical Sciences, São Paulo State University, Araraquara 14800-903, SP, Brazil

<sup>3</sup> Institute of Biomedical Sciences, Federal University of Uberlândia, Uberlândia 38408-100, MG, Brazil; igorsantos\_12@ufu.br

<sup>4</sup> Laboratory of Molecular Immunology, The Rockefeller University, New York, NY 10065, USA

<sup>5</sup> Institute of Technology, University of Tartu, 50090 Tartu, Estonia; andres.merits@ut.ee

<sup>6</sup> Institute of Chemistry, São Paulo State University, Araraquara 14800-060, SP, Brazil; eduardo.cilli@unesp.br

\* Correspondence: paulo.sanches@unesp.br (P.R.d.S.S.); marilia.calmon@unesp.br (M.F.C.)

† These authors contributed equally to this work.

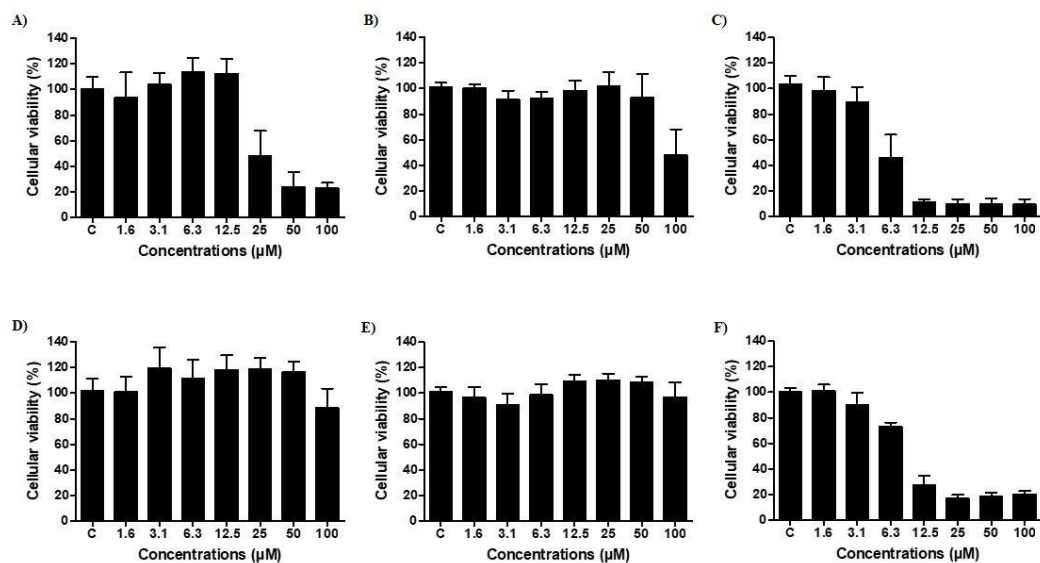

**Figure S1.** Cytotoxicity of the peptides in BHK-21 and Huh-7 cells. Peptides were incubated at different concentrations (1.6 to 100  $\mu$ M) in BHK-21 and Huh-7 cells. After 24 hours, the cell viability was analyzed using MTT method. The percentage values are expressed in relation to the results obtained in cells treated with the control (C, sterile water). (A) GA-Hecate in BHK-21 cells. (B) PSSct1905 in BHK-21 cells. (C) PSSct1910 in BHK-21 cells. (D) GA-Hecate in Huh-7 cells. (E) PSSct1905 in Huh-7 cells. (F) PSSct1910 in Huh-7 cells.
